# Supplementary material
Source: PubMed Central journal article supplement (PMC7094775)

# Supplemental Figure 1

## HC4

siNT

siNT+Blocking Peptide

siEGFR

EGFR

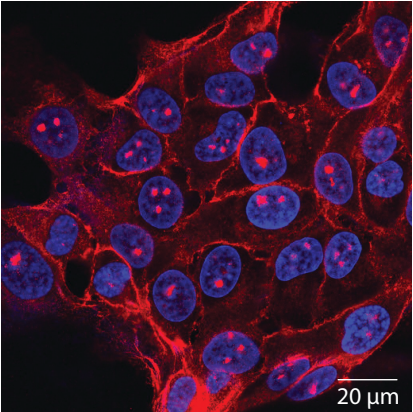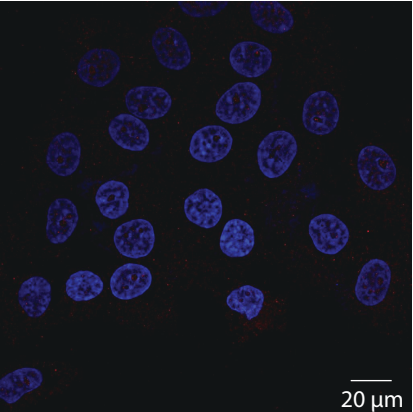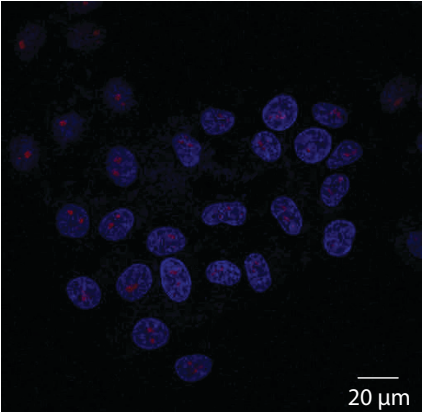

# Supplemental Figure 2

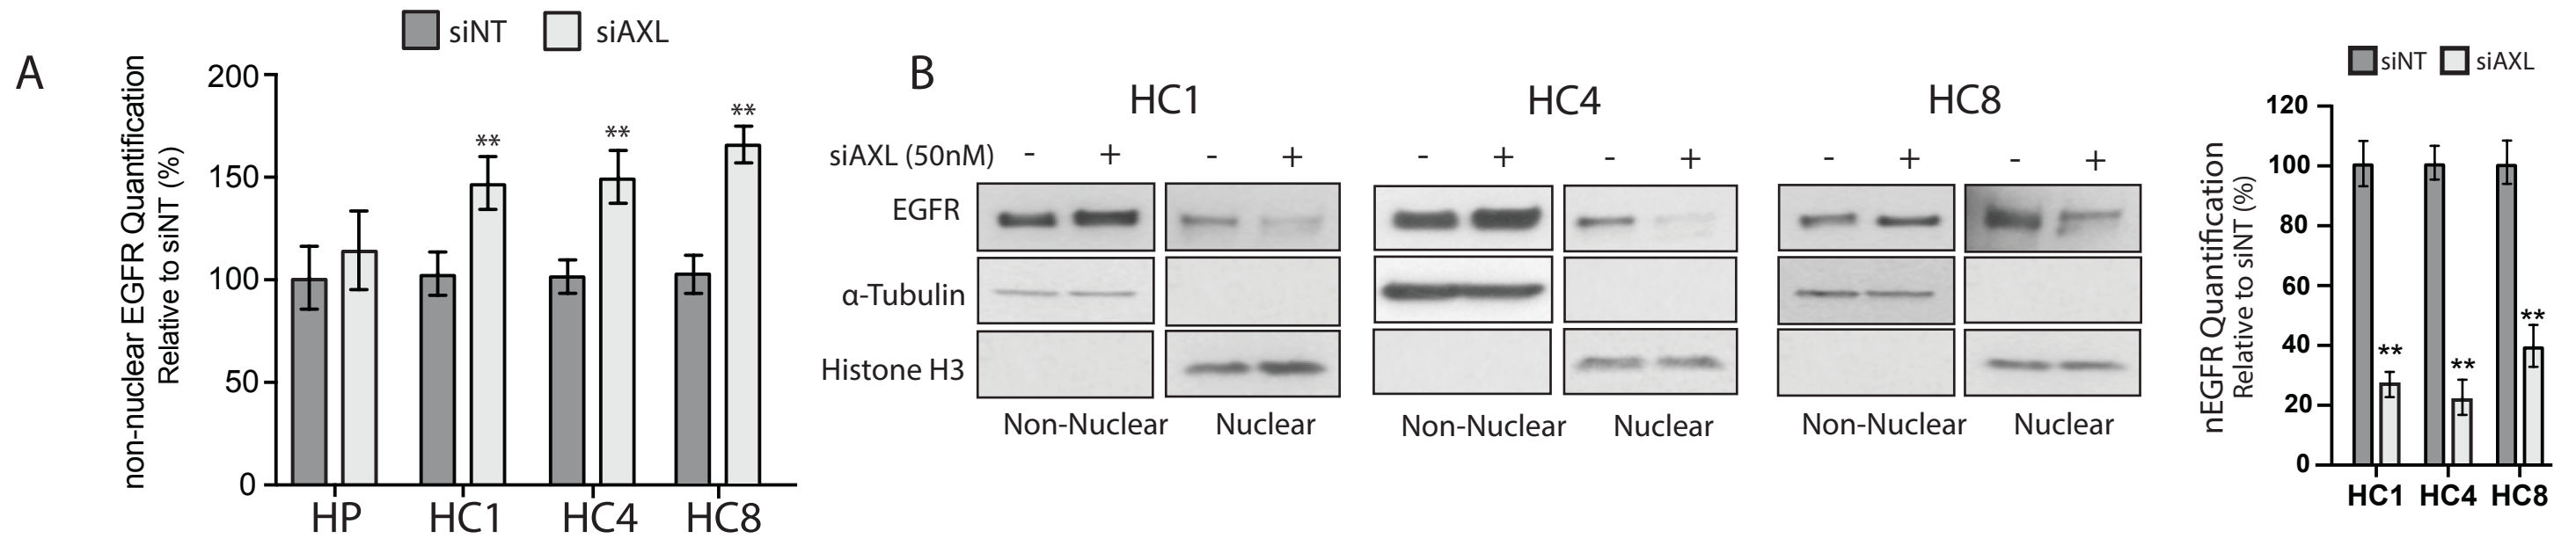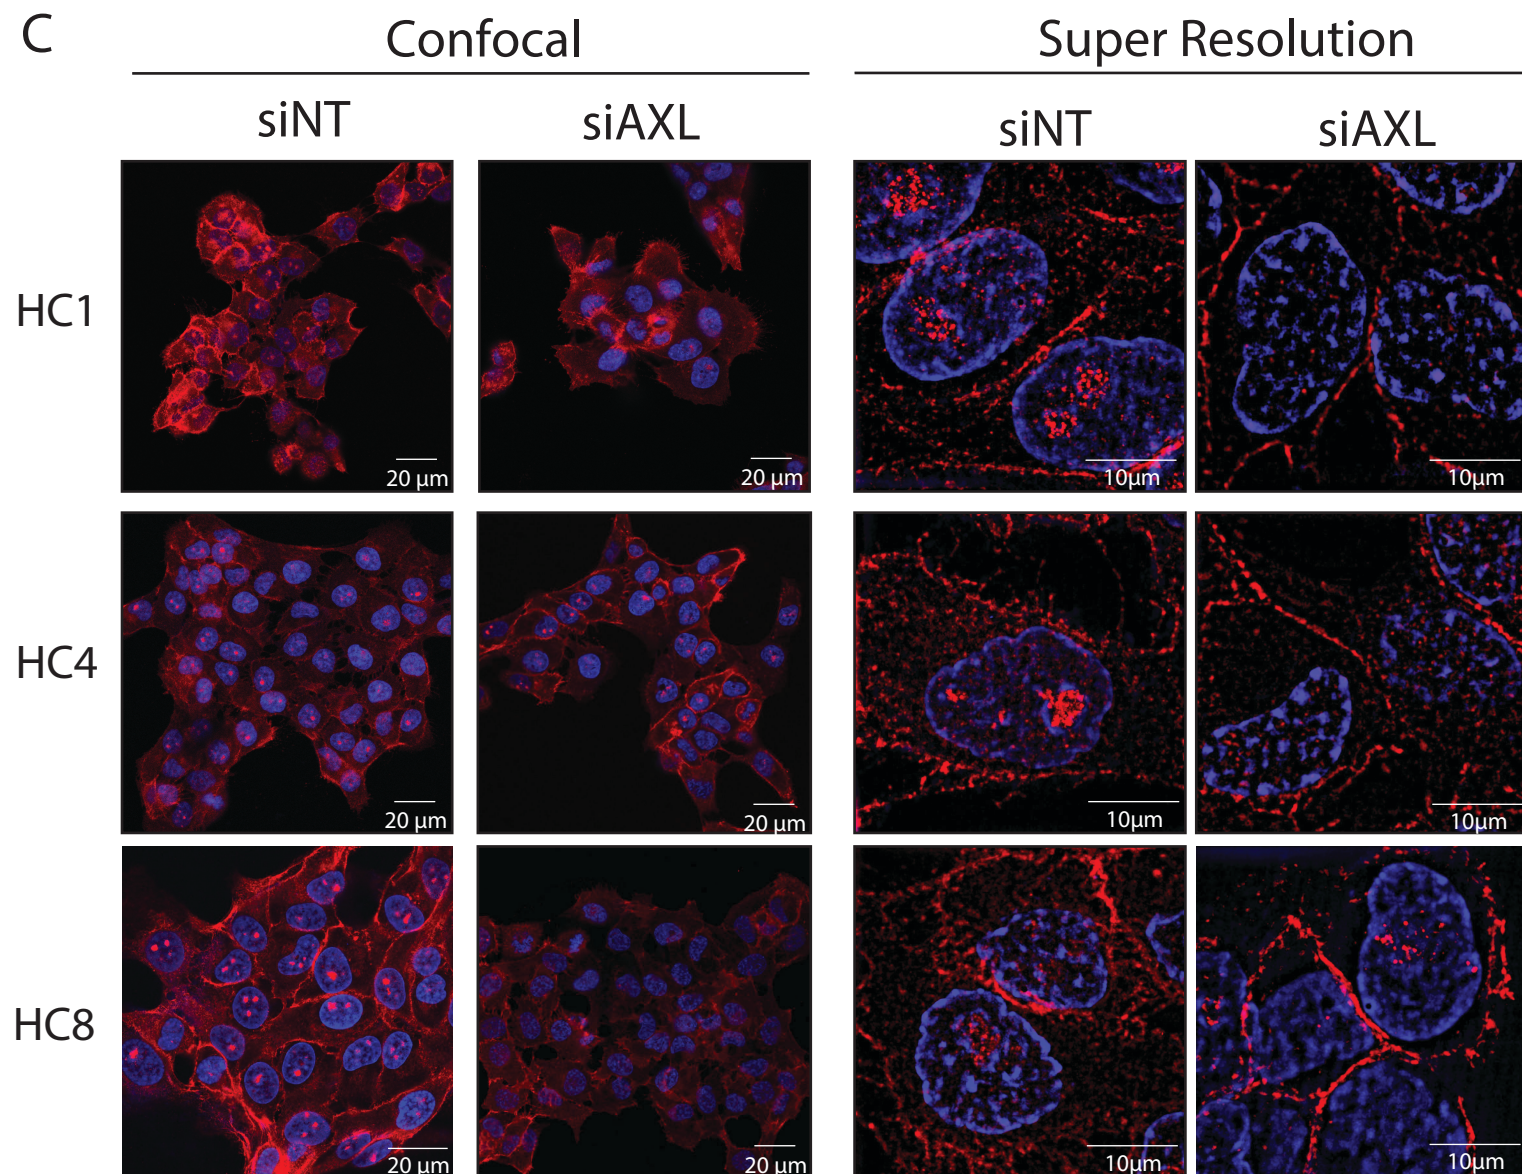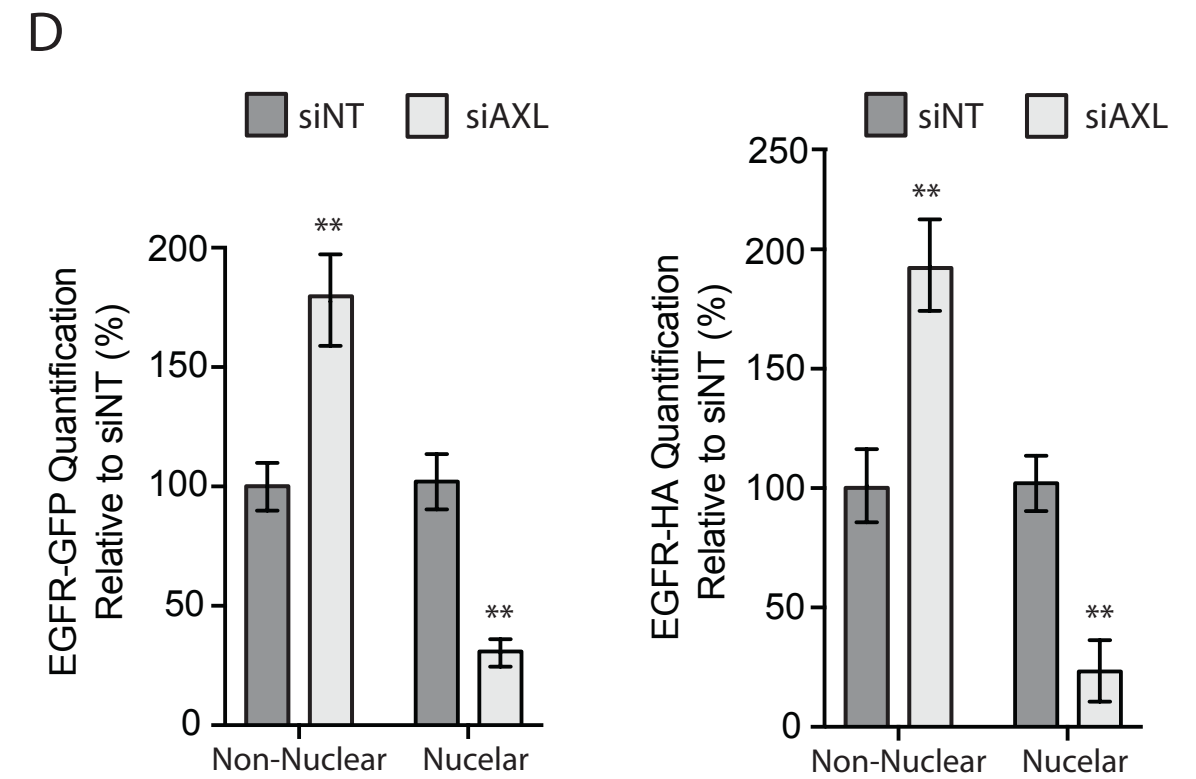



# Supplemental Figure 4

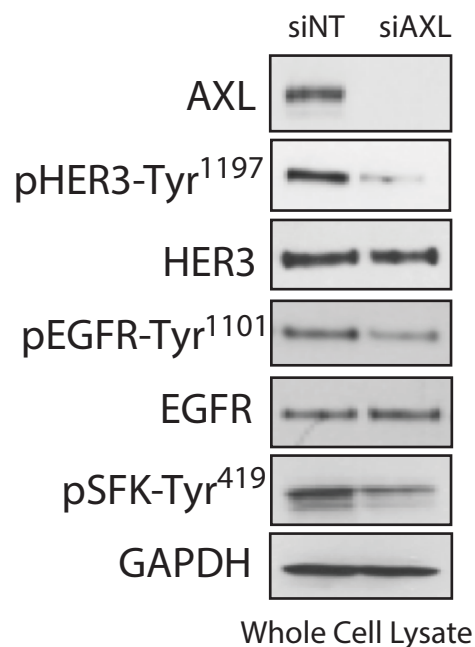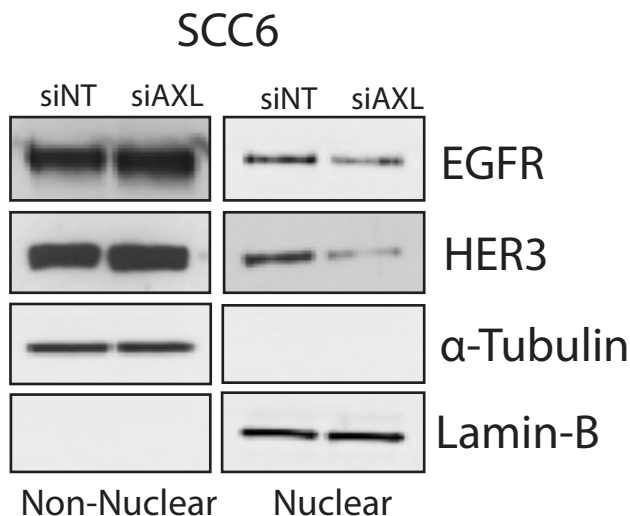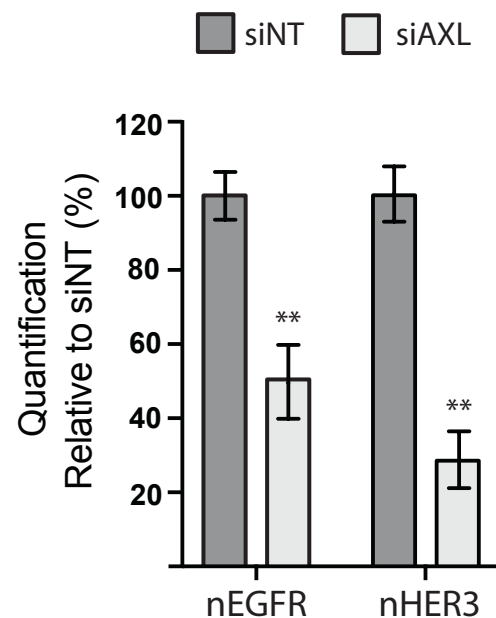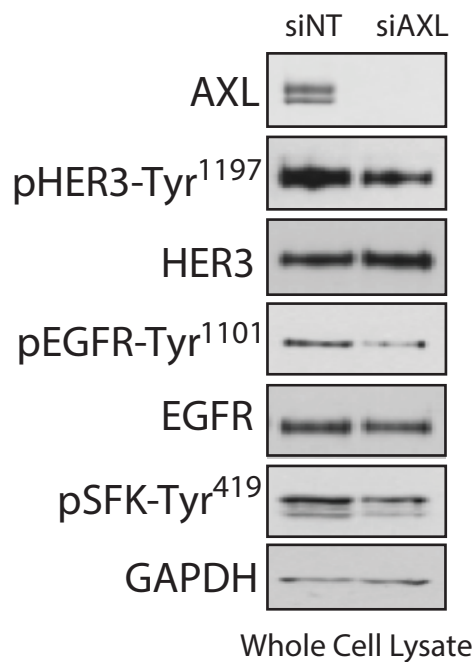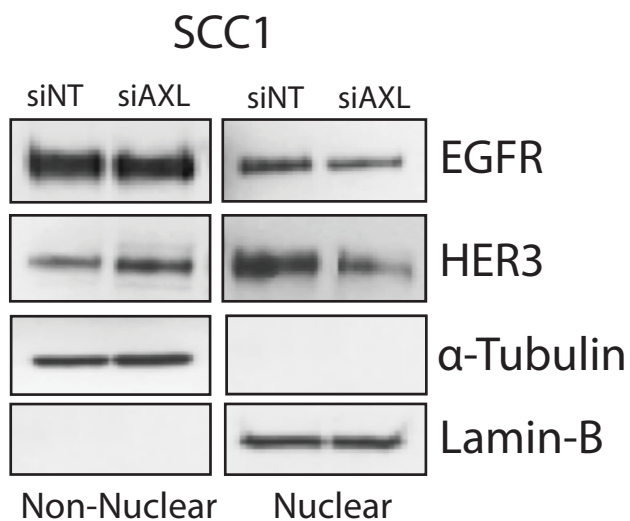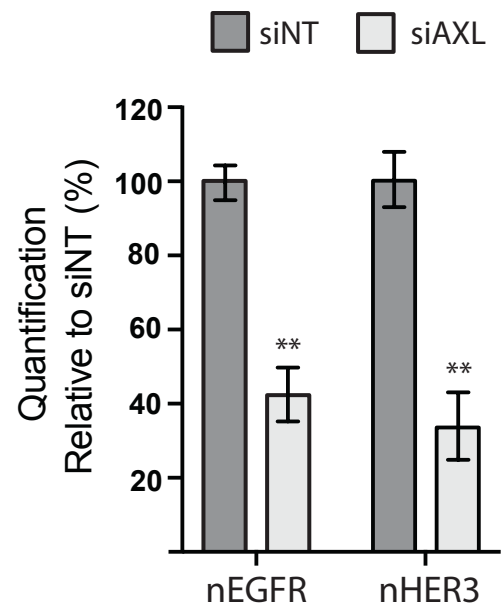

# Supplemental Figure 5

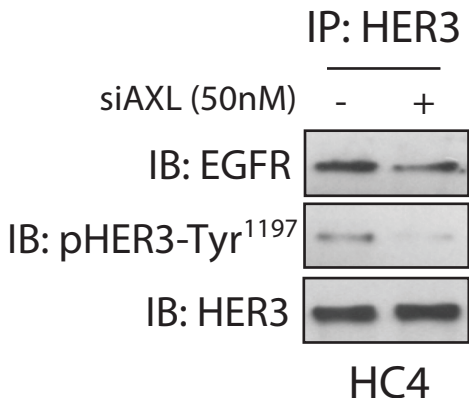

Supplement: NIHMS1564673-supplement-supplementary_figures.pdf [file NIHMS1564673-supplement-supplementary_figures.pdf]
